# Supplementary material
Source: PubMed Central journal article supplement (PMC7609760)
Supplement: 41422_2020_334_MOESM2_ESM.pdf [file 41422_2020_334_MOESM2_ESM.pdf]

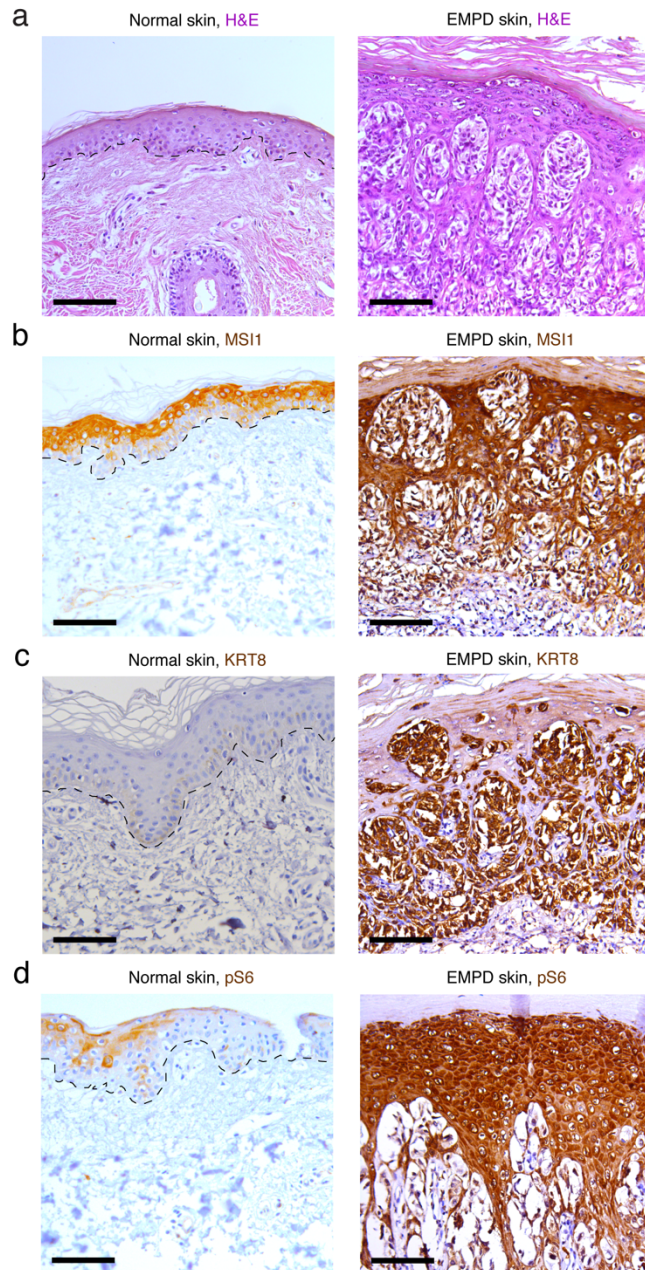

**Fig.S1** Histology and immunohistochemical staining for MSI1, KRT8 and pS6 in normal and EMPD human skin used for single cell RNA-sequencing. **a** H&E staining of human scrotal normal and EMPD skin tissues used for single cell RNA-sequencing. **b-d** Immunohistochemistry for MSI1, KRT8 and pS6 in human scrotal normal and EMPD tissue used for single-cell RNA-sequencing. Representative images are shown. Scale bar: **a-d** – 100  $\mu$ m.
