# Supplementary material
Source: PubMed Central journal article supplement (PMC7609760)
Supplement: 41422_2020_334_MOESM5_ESM.pdf [file 41422_2020_334_MOESM5_ESM.pdf]

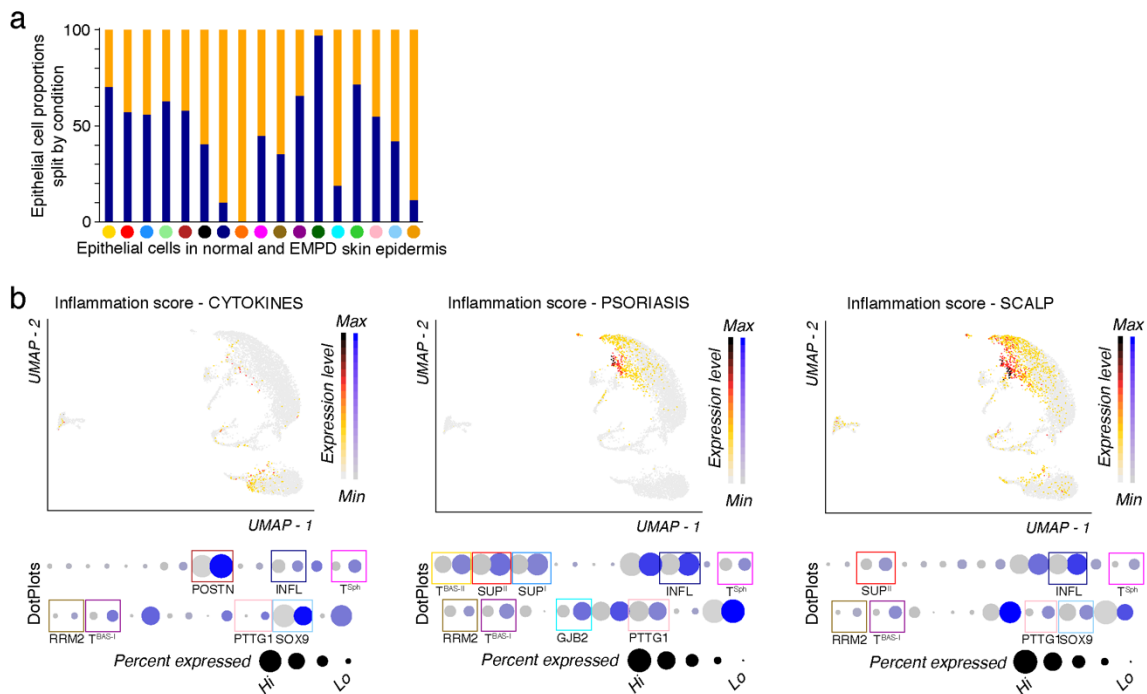

**Fig.S4** Scoring inflammatory modules in EMPD human skin. **a** Epithelial cell proportions in normal and EMPD human skin epidermis split by condition and normalized to library size after quality control. **b** Inflammatory module of epithelial cells was calculated by implementation of an “Inflammation score”. Scored cells were projected on UMAP and evaluated as feature plot and quantified using violin plot. Cells with the highest gene expression levels are colored black. Inflammation score was also visualized by DotPlots and split by condition. Specific epithelial cells from EMPD condition demonstrate higher inflammation score. Psoriasis inflammatory module of epithelial cells were identified by implementation of a “Psoriasis inflammation score”. Scored cells were projected on UMAP and evaluated as feature plot and quantified using violin plot. Cells with the highest gene expression levels are colored black. Psoriasis inflammation score was also visualized by DotPlots and split by condition. Specific epithelial cells from EMPD condition demonstrate higher inflammation score. Scalp inflammatory module of epithelial cells were identified by implementation of a “Scalp inflammation score”. Scored cells were projected on UMAP and evaluated as feature plot and quantified using violin plot. Cells with the highest gene expression levels are colored black. Scalp inflammation score was also visualized by DotPlots and split by condition. Specific epithelial cells from EMPD condition demonstrate higher inflammation score.
