# Supplementary material
Source: PubMed Central journal article supplement (PMC7609760)
Supplement: 41422_2020_334_MOESM7_ESM.pdf [file 41422_2020_334_MOESM7_ESM.pdf]

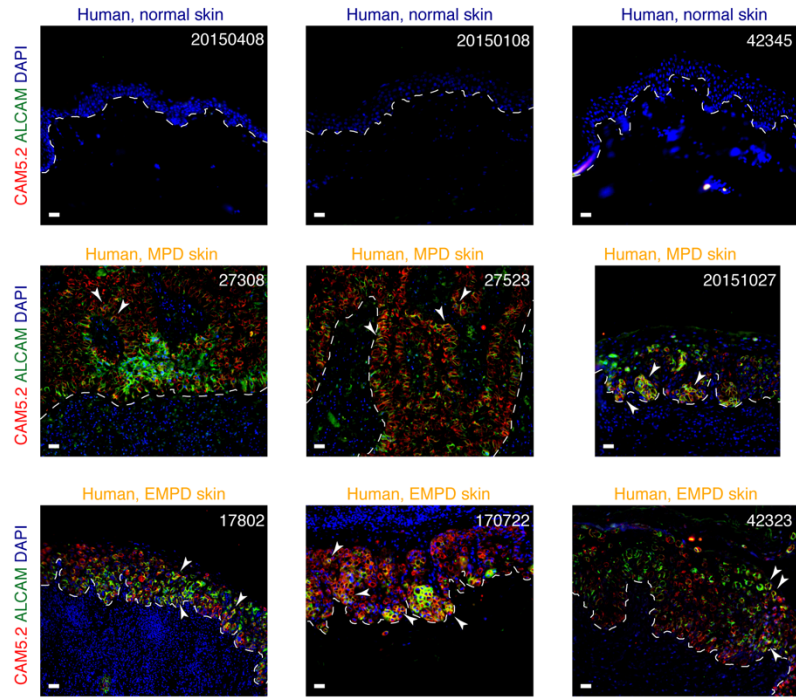

**Fig.S6** Identification of ALCAM as a novel marker for Paget cells in MPD and EMPD human skin. Co-immunofluorescence staining against ALCAM and CAM5.2 in normal (n=3), Mammary (MPD) (n=3), and Extramammary Paget Disease (EMPD) human skin (n=3). Epidermis and dermis are demarcated with broken lines. Scale bar: -25 μm.
