# Supplementary material
Source: PubMed Central journal article supplement (PMC7609760)
Supplement: 41422_2020_334_MOESM8_ESM.pdf [file 41422_2020_334_MOESM8_ESM.pdf]

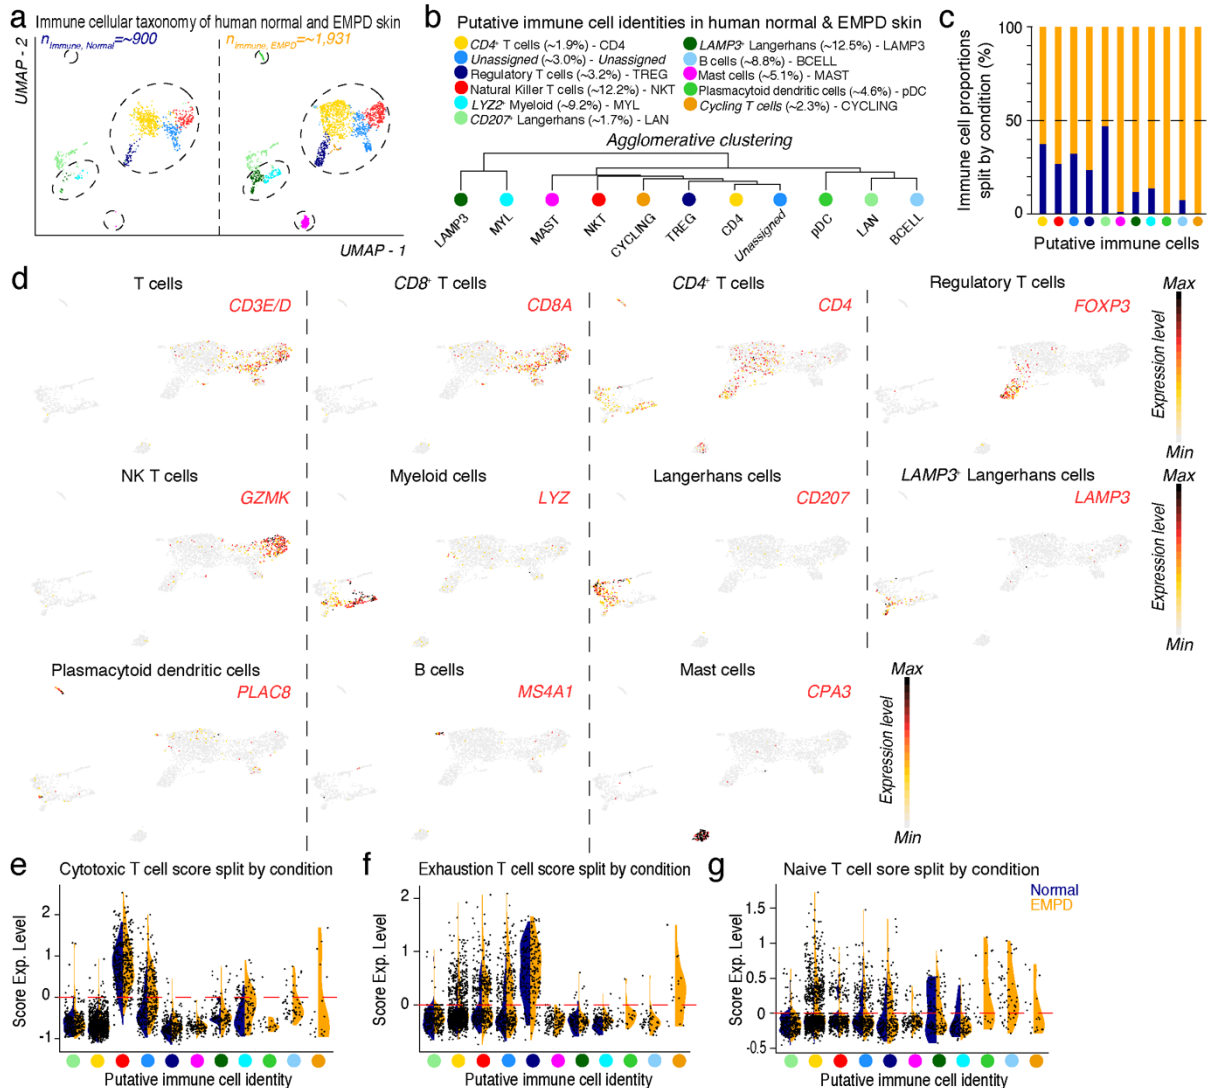

**Fig.S7** Identification and characterization of the immune cell repertoire of human EMPD skin. **a** Clustering and neighbor identification of immune cells split by condition. 900 immune cells from normal skin and 1,931 immune cells from EMPD skin were used for analysis. Cells that appear to be condition-specific are demarcated with broken oval shapes. **b** Eleven putative cell types were identified and color coded. Putative immune cell identity is defined, and their proportions were quantified. Agglomerative clustering of immune cells demonstrates relationships between cell types. **c** Immune cell proportions split by condition and normalized to library size after quality control demonstrates higher proportions and unique immune cell types associated with EMPD condition. **d** Feature plots showing select *bona fide* gene markers of immune cells. The expression levels are color coded. **e** Cytotoxic T cell score was defined by implementation of a “Cytotoxic T cell score”. Scored cells were projected on UMAP and evaluated as feature plot and quantified using violin plot. **f** Exhaustion T cell score was defined by implementation of a “Exhaustion T cell score”. Scored cells were projected on UMAP and evaluated as feature plot and quantified using violin plot. **g** Naive T cell score was defined by implementation of a “Naive T cell score”. Scored cells were projected on UMAP and evaluated as feature plot and quantified using violin plot.
