# Supplementary material
Source: PubMed Central journal article supplement (PMC7609760)
Supplement: 41422_2020_334_MOESM9_ESM.pdf [file 41422_2020_334_MOESM9_ESM.pdf]

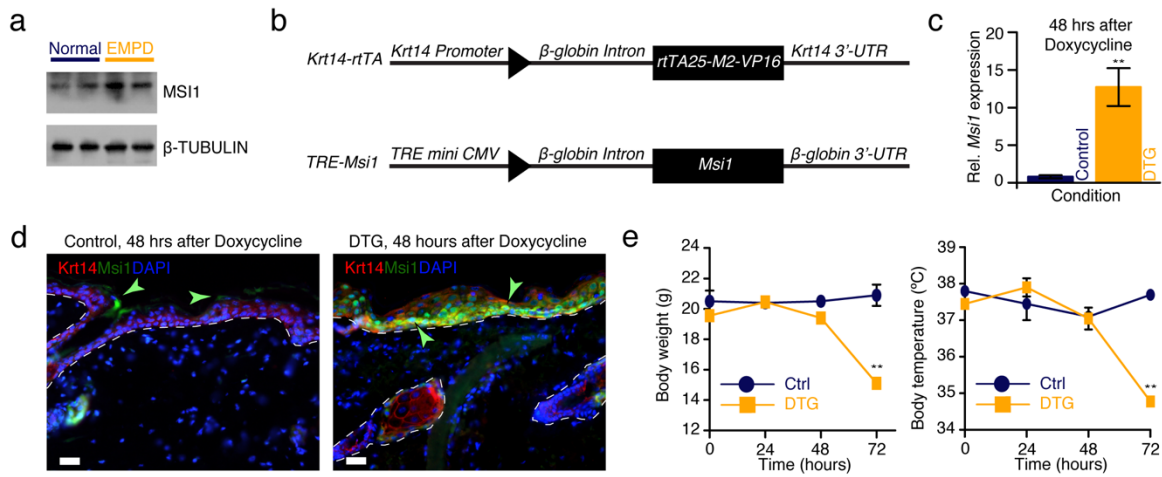

**Fig.S8** Generation of inducible epithelial tissue-specific *Msi1*-overexpressing transgenic mice. **a** Western blotting analysis of MSI1 in normal and EMPD human skin.  $\beta$ -TUBULIN was used as loading control. **b** Schematic of *Krt14-rtTA* and *TRE-Msi1* constructs used in the generation of *Krt14-rtTA;TRE-Msi1* double transgenic (DTG) mice. **c** qRT-PCR analysis of *Msi1* in control (n=4) and DTG (n=4) whole dorsal skin 48 hours after continuous Doxycycline treatment. Student's *t*-test; \*\**P* < 0.01. **d** Immunofluorescence of Krt14 and Msi1 in control and DTG mouse dorsal skin 48 hours after continuous Doxycycline treatment. Green arrow points to Krt14/Msi1-double positive keratinocytes. Representative images are shown. Epidermis and dermis are demarcated with broken line. **e** Quantification of body weight and body temperature in control (n=5) and DTG (n=5) mice at indicated time points after Doxycycline induction. Scale bar: **d** – 25  $\mu$ m.
