# Supplementary material
Source: PubMed Central journal article supplement (PMC7609760)
Supplement: 41422_2020_334_MOESM10_ESM.pdf [file 41422_2020_334_MOESM10_ESM.pdf]

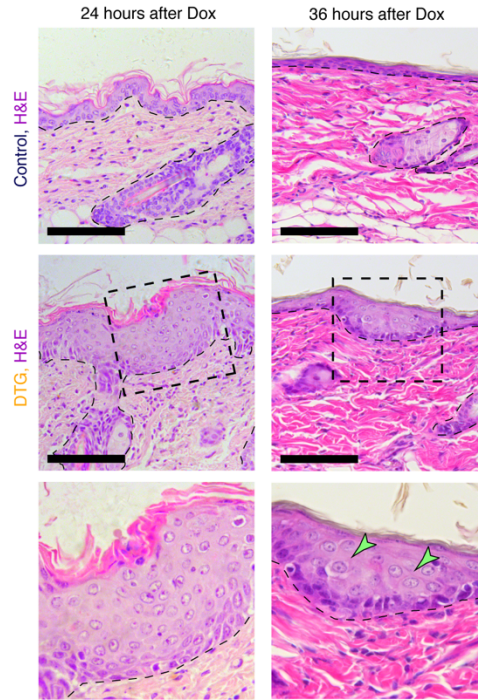

**Fig.S9** Characterization of epidermal phenotype in DTG mice. Histology analyses of control and DTG dorsal skin 24 and 36 hours after continuous Doxycycline (Dox) treatment. 24 hours after induction the epidermis became thickened and the basal layer became disorganized, with many narrow and vertically elongated cells stemming from the basement membrane. 36 hours after Doxycycline administration, the DTG epidermis contained numerous clusters of suprabasal Paget-like cells. Green arrows point to putative Paget-like cells. Representative images are shown. Epidermis and dermis are demarcated with broken line. Scale bar: –100  $\mu$ m.
