# Supplementary material
Source: PubMed Central journal article supplement (PMC7609760)
Supplement: 41422_2020_334_MOESM11_ESM.pdf [file 41422_2020_334_MOESM11_ESM.pdf]

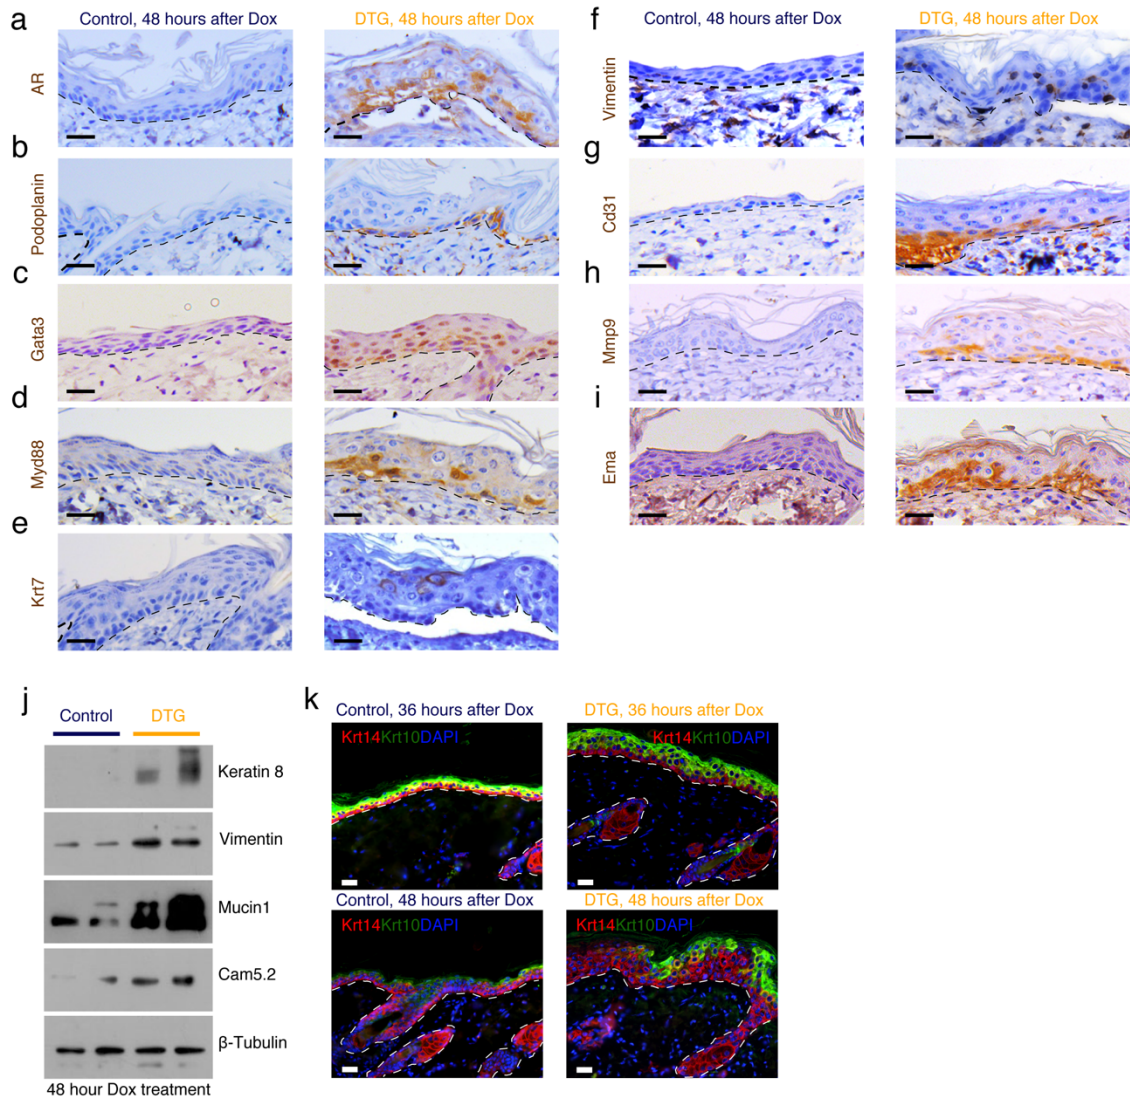

**Fig.S10** Msi1-overexpressing murine skin phenocopies the pathophysiology of human Paget Disease. **a-i** Immunohistochemical staining against Androgen Receptor (Ar), Podoplanin, Gata Binding Protein 3 (Gata3), Myeloid Differentiation Primary Response Protein 88 (Myd88), Cytokeratin 7 (Krt7), Vimentin (Vim), Metalloproteinase 9 (Mmp9), and Epithelial Membrane Antigen (Ema) in control and DTG mouse dorsal skin 48 hours after continuous Doxycycline (Dox) treatment. **j** Western blotting analysis of Krt8, Vim, Muc1, and Cam5.2 in control and DTG mouse skin 48 hours after continuous Dox treatment.  $\beta$ -Tubulin was used as loading control. **k** Immunofluorescence of Krt14 and Krt10 in control and DTG mouse dorsal skin 36 and 48 hours after continuous Dox treatment. Representative images are shown. Epidermis and dermis are demarcated with broken line. Scale bar: **a-i, k** – 25  $\mu$ m.
