# Supplementary material
Source: PubMed Central journal article supplement (PMC7609760)
Supplement: 41422_2020_334_MOESM13_ESM.pdf [file 41422_2020_334_MOESM13_ESM.pdf]

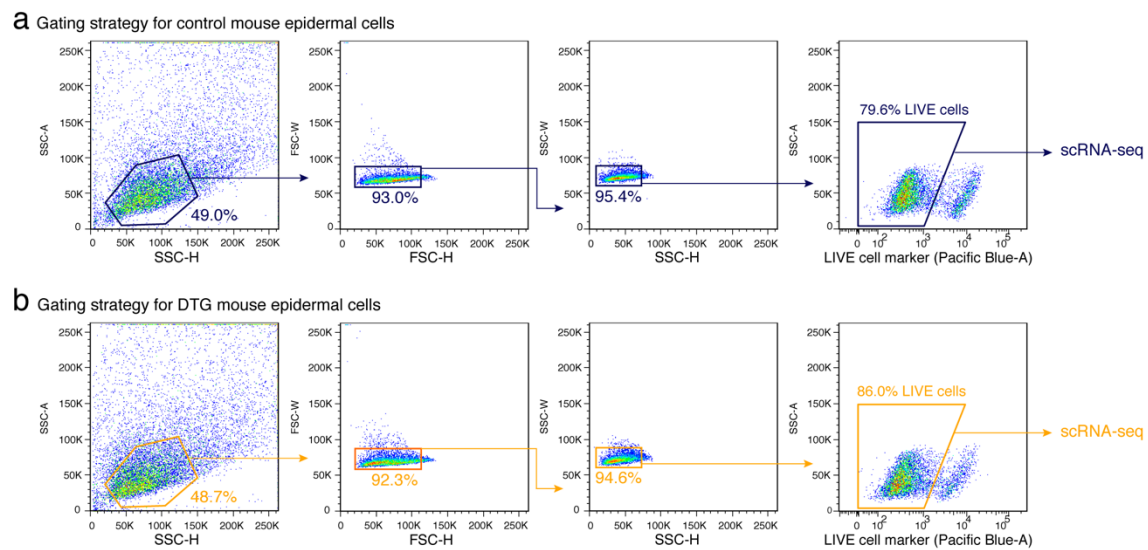

**Fig.S12** Physical sorting of live epidermal cells from mouse skin tissues. Physical sorting of live epidermal cells from control **a** and DTG **b** mouse skin tissues. Live control (~79.6%) and DTG (~86.0%) single cells were processed and used for single cell RNA-sequencing.
