# Supplementary material
Source: PubMed Central journal article supplement (PMC7609760)
Supplement: 41422_2020_334_MOESM14_ESM.pdf [file 41422_2020_334_MOESM14_ESM.pdf]

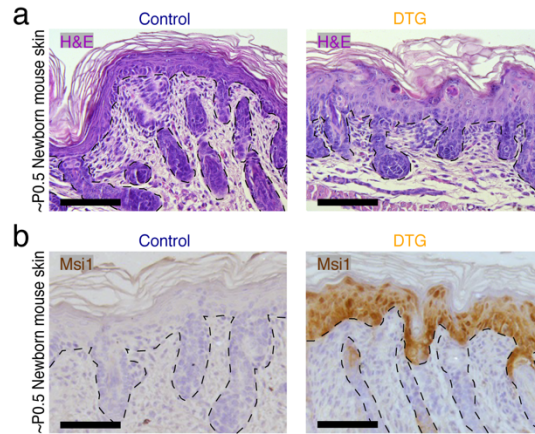

**Fig.S13** Histology and immunohistochemical assessment of Msi1 in control and DTG mouse skin used for single cell RNA-sequencing. **a** Hematoxylin and eosin (H&E) staining of control and DTG newborn mouse skin tissues used for single cell RNA-sequencing. Doxycycline treatment was initiated *in utero* from E16.5 to postnatal day (P 0.5). **b** Immunohistochemical staining against Msi1 in control and DTG mouse skin. Representative images are shown. Epidermis and dermis are demarcated with broken line. Scale bar: **a, b** – 100  $\mu$ m.
