# Supplementary material
Source: PubMed Central journal article supplement (PMC7609760)
Supplement: 41422_2020_334_MOESM16_ESM.pdf [file 41422_2020_334_MOESM16_ESM.pdf]

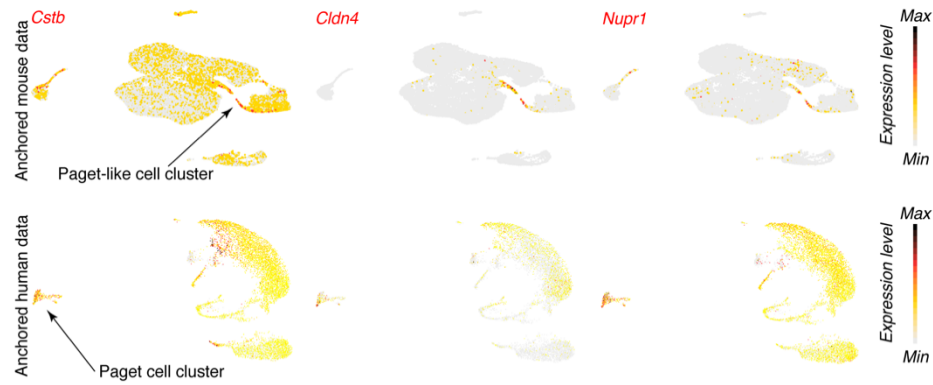

**Fig.S15** Identification of shared biomarkers between Paget and Paget-like cells. Selected common biomarkers shared between Paget-like and Paget cells (Log F.C. = 0.25X, 25% cell/cluster, Wilcox test,  $P < 0.05$ ). Shared genes between Paget and Paget-like cells were identified by selecting all genes in each cluster, followed by manual comparison with each other. A total of 69 genes met this criterion and identified as 'shared' markers.
