# Supplementary material
Source: PubMed Central journal article supplement (PMC7609760)
Supplement: 41422_2020_334_MOESM17_ESM.pdf [file 41422_2020_334_MOESM17_ESM.pdf]

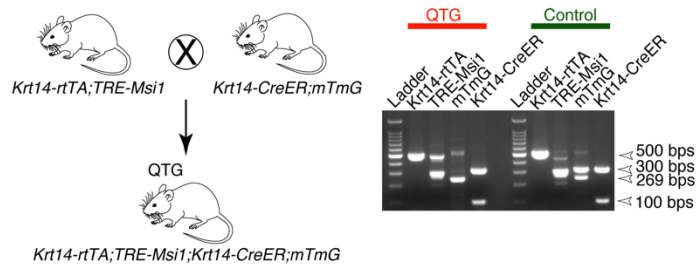

**Fig.S16** Generation of quadrupled transgenic mice for lineage tracing analyses. Strategy for generation of *Krt14-rtTA;TRE-Msi1;Krt14-CreER;mTmG* quadrupled transgenic (QTG) mice. Genotypes of F1 mice resultant from a cross between *Krt14-rtTA;TRE-Msi1* and *Krt14-CreER;mTmG* mice. QTG mice were used for lineage tracing assays.
