# Supplementary material
Source: PubMed Central journal article supplement (PMC7609760)
Supplement: 41422_2020_334_MOESM19_ESM.pdf [file 41422_2020_334_MOESM19_ESM.pdf]

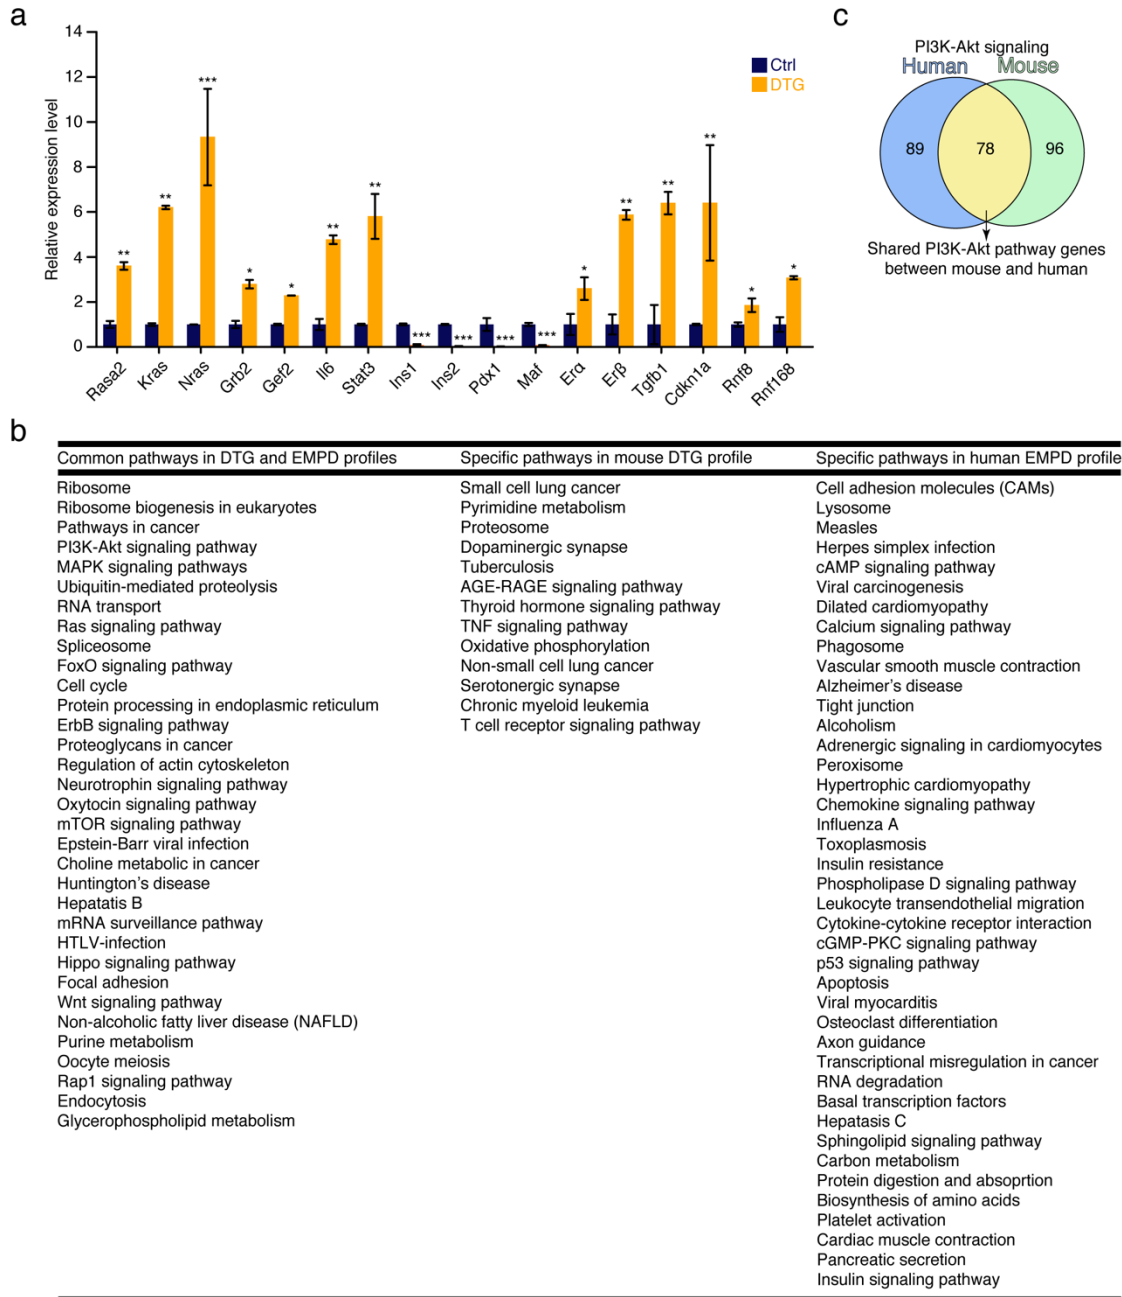

**Fig.S18** Gene Ontology and KEGG pathway analyses of DTG mouse and human EMPD skin. **a** qRT-PCR analysis of select DEGs in control vs. DTG mouse dorsal skin. Student's *t*-test; \* $P < 0.05$ ; \*\* $P < 0.01$ ; \*\*\* $P < 0.001$ . **b** KEGG pathway analysis of DEGs in DTG mouse and EMPD human skin. Common and specific pathways in DTG ( $P \leq 10^{-11}$ ) and EMPD human skin ( $P \leq 10^{-13}$ ) are shown. **c** Venn diagrams showing overlapping Pi3K-Akt signaling pathway members between DTG mouse and EMPD human skin. Values in the graphs represent means  $\pm$  SD.
