# Supplementary material
Source: PubMed Central journal article supplement (PMC7609760)
Supplement: 41422_2020_334_MOESM20_ESM.pdf [file 41422_2020_334_MOESM20_ESM.pdf]

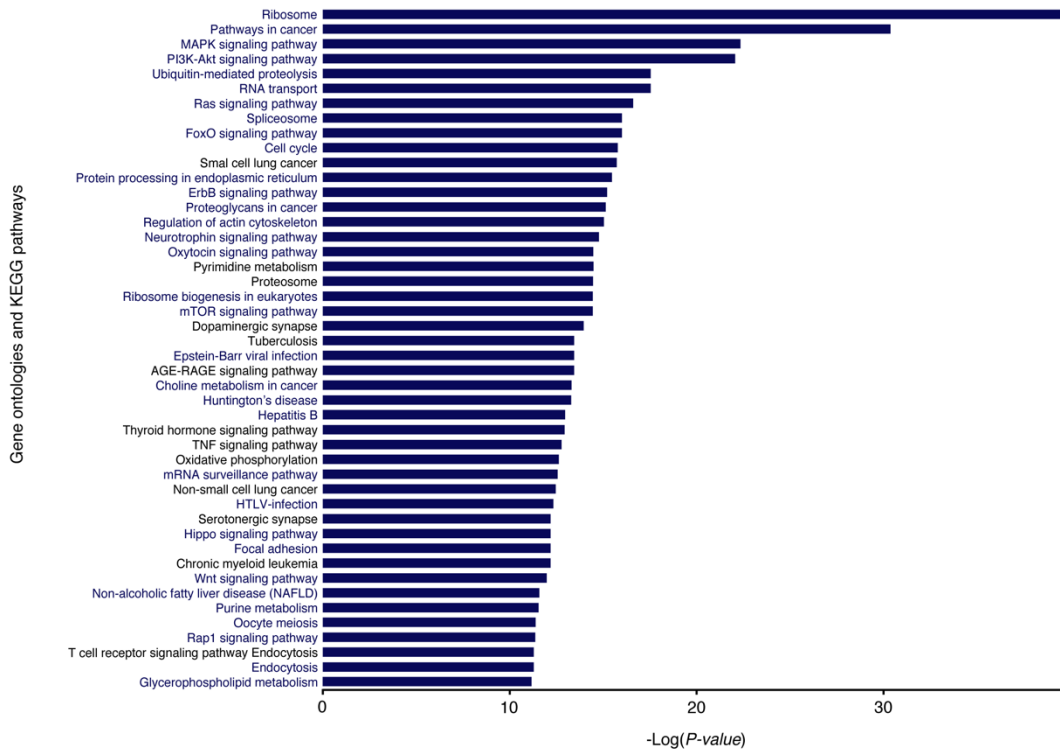

**Fig.S19** Gene Ontology and KEGG analyses of DTG mouse skin. Quantification of GO terms in DTG mouse skin ( $P \leq 10^{-11}$ ). Blue fonts indicate common GO terms between DTG mouse and EMPD human skin.
