# Supplementary material
Source: PubMed Central journal article supplement (PMC7609760)
Supplement: 41422_2020_334_MOESM21_ESM.pdf [file 41422_2020_334_MOESM21_ESM.pdf]

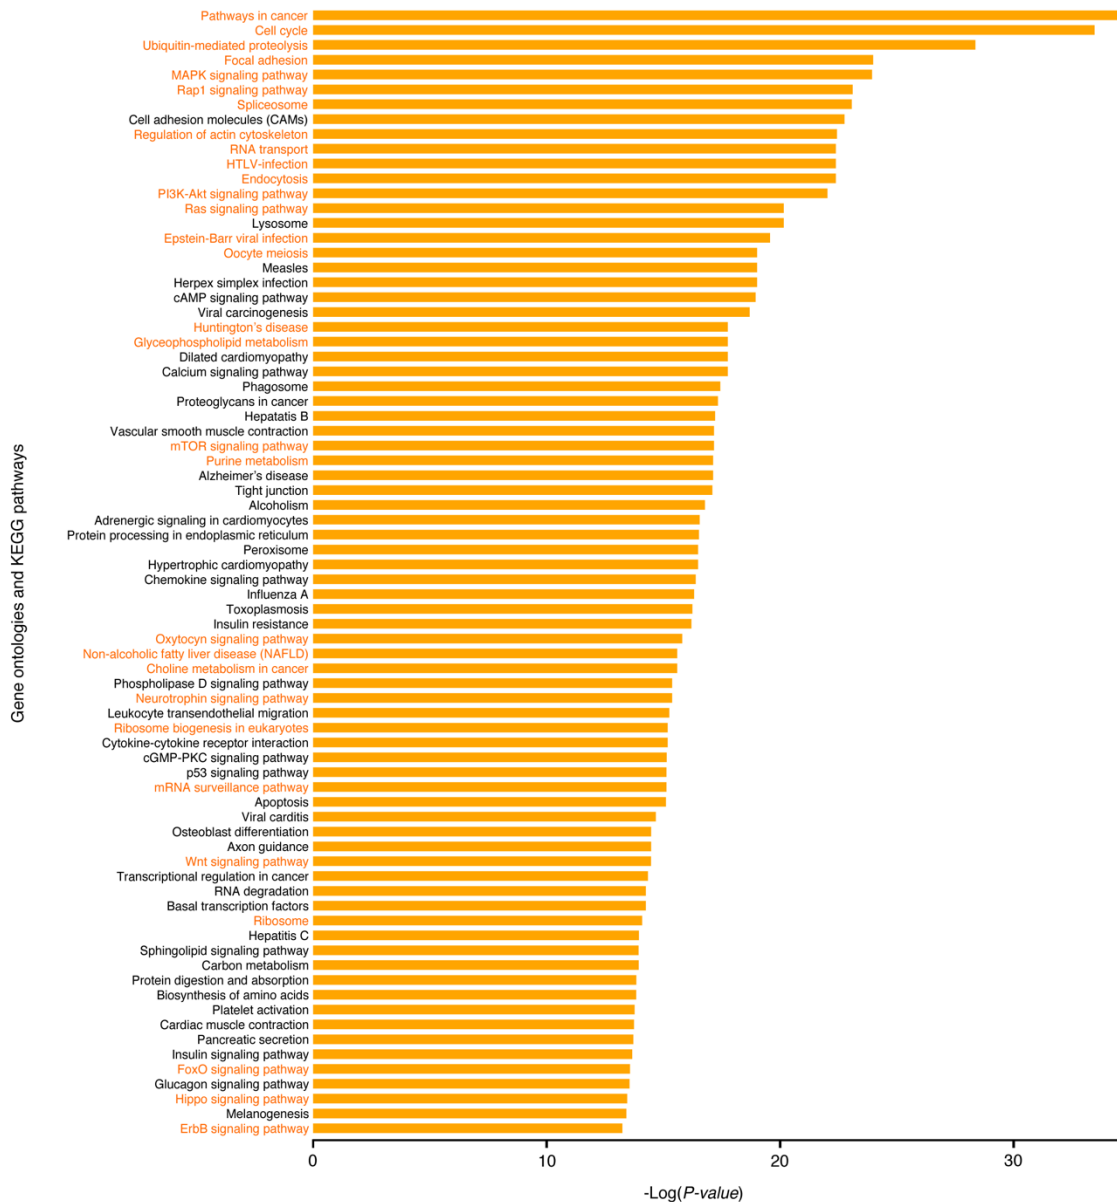

**Fig.S20** Gene Ontology analyses of EMPD human skin. Quantification of GO terms in EMPD human skin ( $P \leq 10^{-13}$ ). Orange fonts indicate common GO terms between DTG mouse and EMPD human skin.
