# Supplementary material
Source: PubMed Central journal article supplement (PMC7609760)
Supplement: 41422_2020_334_MOESM22_ESM.pdf [file 41422_2020_334_MOESM22_ESM.pdf]

| Common GSEA pathways in DTG mouse profile | FDR q-value | Common GSEA pathways in human EMPD profile | FDR q-value |
|-------------------------------------------|-------------|--------------------------------------------|-------------|
| Reactive oxygen species pathway           | 0.0327731   | Mitotic spindle                            | 0.021119323 |
| Tnfr signaling via Nfκβ                   | 0.0426089   | G2M checkpoint                             | 0.035981484 |
| Tgfβ signaling                            | 0.06422008  | Protein secretion                          | 0.031027425 |
| Unfolded protein response                 | 0.08009433  | Spermatogenesis                            | 0.035981484 |
| Protein secretion                         | 0.066596486 | Unfolded protein response                  | 0.033009045 |
| Inflammatory response                     | 0.06004889  | PI3K-Akt Mtor signaling pathway            | 0.041648515 |
| Androgen response                         | 0.055576608 | E2F targets                                | 0.07237437  |
| P53 signaling pathway                     | 0.05020514  | Myc targets                                | 0.073901996 |
| Kras signaling pathway                    | 0.051614564 | DNA repair signaling pathway               | 0.079273544 |
| Interferon gamma response                 | 0.1254483   | P53 signaling pathway                      | 0.090082314 |
| Il6 Jak Stat3 signaling                   | 0.12911785  | Tnfr signaling via Nfκβ                    | 0.10769729  |
| Il2 Stat signaling                        | 0.12652881  | Inflammatory response                      | 0.10103748  |
| Apical surface pathway                    | 0.13418165  | Androgen response                          | 0.119132645 |
| UV response                               | 0.20511864  | MtorC1 signaling pathway                   | 0.11721379  |
| Complement signaling pathway              | 0.19520234  | Apoptosis                                  | 0.16142263  |
| MtorC1 signaling pathway                  | 0.20413356  | Complement signaling pathway               | 0.17696123  |
| DNA repair signaling pathway              | 0.19583966  | Interferon gamma response                  | 0.17967439  |
| Coagulation signaling pathway             | 0.21024227  | UV response signaling pathway              | 0.1964843   |
| Myc targets                               | 0.25258413  | Interferon alpha response                  | 0.2022174   |
|                                           |             | Apical surface                             | 0.1967898   |
|                                           |             | UV response                                | 0.19712204  |
|                                           |             | Heme emtabolism                            | 0.192529    |
|                                           |             | Allograft rejection pathway                | 0.19243732  |
|                                           |             | Pancreas β cell-associated pathway         | 0.20387211  |
|                                           |             | Bile acid metabolism                       | 0.21018603  |
|                                           |             | Fatty acid metabolism                      | 0.22468795  |
|                                           |             | Il6 Jak Stat3 signaling pathway            | 0.21960117  |
|                                           |             | Il2 Stat5 signaling pathway                | 0.2184198   |

**Fig.S21** GSEA analysis of DTG mouse and human EMPD skin. GSEA profiles in DTG mouse and EMPD human skin. Colored fonts indicate common GSEA profiles between DTG mouse and human EMPD skin.
