# Supplementary material
Source: PubMed Central journal article supplement (PMC7609760)
Supplement: 41422_2020_334_MOESM24_ESM.pdf [file 41422_2020_334_MOESM24_ESM.pdf]

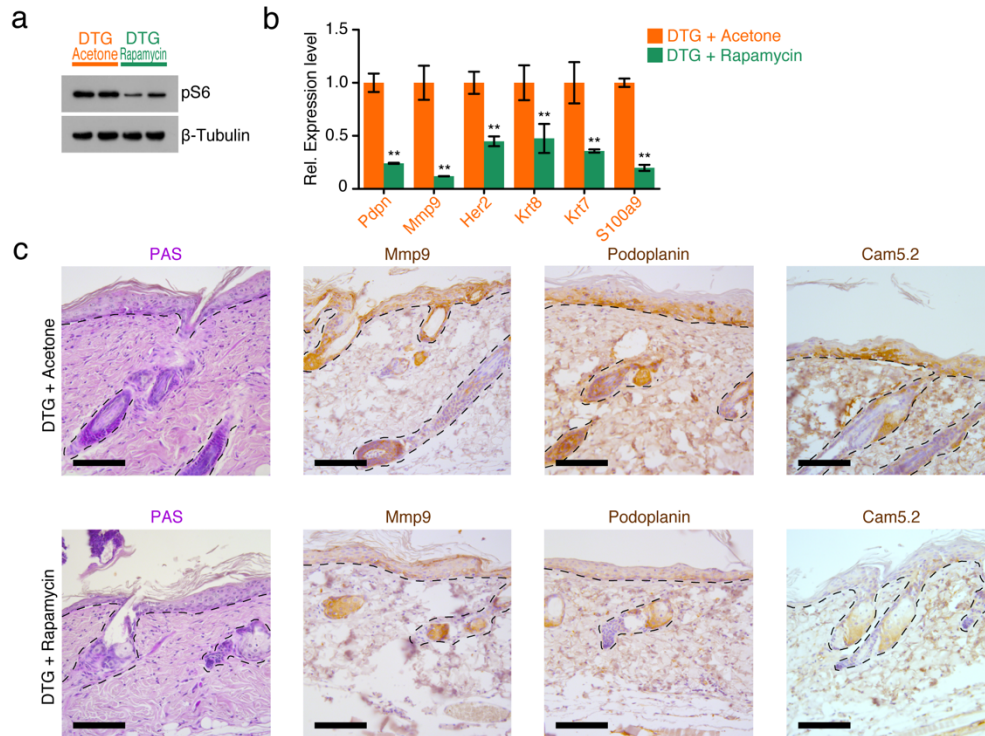

**Fig.S23** Rapamycin suppresses EMPD-associated marker genes in Msi1-induced murine skin. **a** Western blotting analysis of pS6 in vehicle- and Rapamycin-treated DTG mice 48 hours after continuous Doxycycline treatment.  $\beta$ -Tubulin was used as loading control. **b** qRT-PCR analysis of *Pdpn*, *Mmp9*, *Her2*, *Krt8*, *Krt7*, and *S100a9* in skin of vehicle- or Rapamycin-treated DTG mice 48 hours after continuous Doxycycline induction. Student's *t*-test; \*\* $P < 0.01$ . **c** PAS and immunohistochemical staining against Mmp9, Pdpn, and Cam5.2 in dorsal skin of vehicle- or Rapamycin-treated DTG mice 48 hours after continuous Doxycycline induction. Representative images are shown. Epidermis and dermis are demarcated with broken line. Scale bar: **c**– 50  $\mu$ m.
