# Supplementary material
Source: PubMed Central journal article supplement (PMC7609760)
Supplement: 41422_2020_334_MOESM29_ESM.pdf [file 41422_2020_334_MOESM29_ESM.pdf]

**Table S1:** Normal human skin samples used in the study (n=15).

| <b>Patient ID</b> | <b>Gender</b> | <b>Ethnicity</b> | <b>Age (yrs.)</b> | <b>Body location</b> | <b>Clinical history</b> |
|-------------------|---------------|------------------|-------------------|----------------------|-------------------------|
| 20150408          | Male          | Asian            | 62                | Back                 | NA                      |
| 41785             | Male          | Asian            | 65                | Abdomen              | NA                      |
| 42233             | Male          | Asian            | 46                | Back                 | NA                      |
| 42345             | Male          | Asian            | 44                | Thigh                | NA                      |
| 42415             | Male          | Asian            | 70                | Lower jaw            | NA                      |
| 42537             | Male          | Asian            | 63                | Abdomen              | NA                      |
| 2015108           | Male          | Asian            | 38                | Chest                | NA                      |
| 20150408          | Male          | Asian            | 62                | Shank                | NA                      |
| 41790             | Female        | Asian            | 79                | Abdomen              | NA                      |
| 2017172           | Female        | Asian            | 43                | Shank                | NA                      |
| 20140325          | Female        | Asian            | 69                | Back                 | NA                      |
| 20160912          | Female        | Asian            | 63                | Thigh                | NA                      |
| 170721            | Female        | Asian            | 77                | Vulva                | NA                      |
| EMPD04            | Male          | Asian            | 58                | Scrotum              | NA                      |
| 20190513          | Male          | Asian            | 58                | Scrotum              | NA                      |
