# Supplementary material
Source: PubMed Central journal article supplement (PMC7609760)
Supplement: 41422_2020_334_MOESM30_ESM.pdf [file 41422_2020_334_MOESM30_ESM.pdf]

**Table S2:** EMPD human skin samples used in the study (n=38).

| <b>Patient ID</b> | <b>Gender</b> | <b>Ethnicity</b> | <b>Age (yrs.)</b> | <b>Body location</b> | <b>Clinical history</b> |
|-------------------|---------------|------------------|-------------------|----------------------|-------------------------|
| 170722            | Female        | Asian            | 77                | Vulva                | Primary onset           |
| 42120             | Male          | Asian            | 63                | Scrotum              | Primary onset           |
| 42211             | Male          | Asian            | 84                | Scrotum              | Recurrence              |
| 42323             | Male          | Asian            | 66                | Scrotum              | Primary onset           |
| 42420             | Male          | Asian            | 60                | Scrotum              | Primary onset           |
| 42737             | Male          | Asian            | 59                | Scrotum              | Primary onset           |
| 20150147          | Male          | Asian            | 80                | Scrotum              | Primary onset           |
| 20151118          | Male          | Asian            | 64                | Scrotum              | Primary onset           |
| 20141752          | Male          | Asian            | 28                | Scrotum              | Primary onset           |
| 20120653          | Male          | Asian            | 52                | Scrotum              | Primary onset           |
| 170802            | Male          | Asian            | 70                | Scrotum              | Primary onset           |
| 170804            | Male          | Asian            | 68                | Scrotum              | Primary onset           |
| 27389             | Male          | Asian            | 55                | Scrotum              | Primary onset           |
| 28270             | Male          | Asian            | 62                | Scrotum              | Primary onset           |
| 24280             | Male          | Asian            | 58                | Scrotum              | Primary onset           |
| 27377             | Male          | Asian            | 76                | Scrotum              | Recurrence              |
| 20150776          | Male          | Asian            | 48                | Scrotum              | Primary onset           |
| 20141576          | Male          | Asian            | 53                | Scrotum              | Primary onset           |
| 20142031          | Male          | Asian            | 65                | Scrotum              | Primary onset           |
| 141285            | Male          | Asian            | 82                | Scrotum              | Primary onset           |
| 156066            | Male          | Asian            | 76                | Scrotum              | Primary onset           |
| 155780            | Male          | Asian            | 85                | Scrotum              | Recurrence              |
| 155782            | Male          | Asian            | 83                | Scrotum              | Primary onset           |
| 155667            | Male          | Asian            | 79                | Scrotum              | Primary onset           |
| 155537            | Male          | Asian            | 66                | Scrotum              | Primary onset           |
| 15492             | Male          | Asian            | 74                | Scrotum              | Primary onset           |

|          |      |       |    |         |               |
|----------|------|-------|----|---------|---------------|
| 16360    | Male | Asian | 82 | Scrotum | Primary onset |
| 164333   | Male | Asian | 83 | Scrotum | Primary onset |
| 165220   | Male | Asian | 78 | Scrotum | Primary onset |
| 164912   | Male | Asian | 62 | Scrotum | Primary onset |
| 1152     | Male | Asian | 64 | Scrotum | Primary onset |
| 164724   | Male | Asian | 76 | Scrotum | Primary onset |
| 164637   | Male | Asian | 68 | Scrotum | Primary onset |
| EMPD01   | Male | Asian | 68 | Scrotum | Recurrence    |
| EMPD02   | Male | Asian | 81 | Scrotum | Primary onset |
| EMPD03   | Male | Asian | 81 | Scrotum | Primary onset |
| EMPD04   | Male | Asian | 69 | Scrotum | Recurrence    |
| 20190513 | Male | Asian | 58 | Scrotum | NA            |
