# Supplementary material
Source: PubMed Central journal article supplement (PMC7609760)
Supplement: 41422_2020_334_MOESM31_ESM.pdf [file 41422_2020_334_MOESM31_ESM.pdf]

**Table S3:** MPD human skin samples used in the study (n=6).

| <b>Patient ID</b> | <b>Gender</b> | <b>Ethnicity</b> | <b>Age (yrs.)</b> | <b>Body location</b> | <b>Clinical history</b> |
|-------------------|---------------|------------------|-------------------|----------------------|-------------------------|
| 20122660          | Female        | Asian            | 78                | Left breast          | Primary onset           |
| 20141741          | Female        | Asian            | 61                | Left breast          | Primary onset           |
| 20151027          | Female        | Asian            | 64                | Left breast          | Primary onset           |
| 20150470          | Female        | Asian            | 65                | Left breast          | Primary onset           |
| 27523             | Female        | Asian            | 61                | Right breast         | Primary onset           |
| 27308             | Female        | Asian            | 65                | Right breast         | Primary onset           |
