# Supplementary material
Source: PubMed Central journal article supplement (PMC7609760)
Supplement: 41422_2020_334_MOESM32_ESM.pdf [file 41422_2020_334_MOESM32_ESM.pdf]

**Table S4:** Primers used in the study.

| Gene                   | Forward Primer<br>(5'-3')        | Reverse Primer<br>(5'-3')        | Organism |
|------------------------|----------------------------------|----------------------------------|----------|
| <i>GADPH</i>           | <i>GTCATCATCTCTGCCCCCTCT</i>     | <i>TAAGCAGTTGGTGGTGCAGGA</i>     | Human    |
| <i>MSI1</i>            | <i>GGGACTCAGTTGGCAGACTAC</i>     | <i>CTGGTCCATGAAAGTGACGAA</i>     | Human    |
| <i>MMP9</i>            | <i>TCATCTTCCAAGGCCAATCC</i>      | <i>GCAGAAGCCGAAGAGCTTGT</i>      | Human    |
| <i>VIMENTIN</i>        | <i>GACGCCATCAACACCGAGTT</i>      | <i>CTTTGTCTGTTGGTTAGCTGGT</i>    | Human    |
| <i>KRT8</i>            | <i>CAGAAGTCCTACAAGGTGTCCA</i>    | <i>CTCTGGTTGACCGTAACTGCG</i>     | Human    |
| <i>KRT7</i>            | <i>TCCGCGAGGTACCATTAAC</i>       | <i>GCTCTGTCAACTCCGTCTCAT</i>     | Human    |
| <i>PDPN</i>            | <i>AGCAATTCTCCTGCCTCAGC</i>      | <i>AGATCATCCTCGCCGATACG</i>      | Human    |
| <i>Hif1a</i>           | <i>TCGACACAGCCTCGATATGAA</i>     | <i>TTCCGGCTCATAACCCATCA</i>      | Mouse    |
| <i>Gapdh</i>           | <i>CTTAGCACCCCTGGCCAAG</i>       | <i>TGGTCATGAGTCTTCCACG</i>       | Mouse    |
| <i>Mmp9</i>            | <i>GCAGAGGCATACTTGTACCG</i>      | <i>TGATGTTATGATGGTCCCCTTG</i>    | Mouse    |
| <i>Pdpm</i>            | <i>ACCGTCCAGTGTGTTCTG</i>        | <i>ACCATGCCGTCTCCTGTACC</i>      | Mouse    |
| <i>Stat3</i>           | <i>CACCTTGGATTGAGAGTCAAGAC</i>   | <i>AGGAATCGGCTATATTGCTGGT</i>    | Mouse    |
| <i>S100a9</i>          | <i>GAGCGCAGCATAACCACCATC</i>     | <i>AGCCATTCCCTTTAGACTTG</i>      | Mouse    |
| <i>Gata3</i>           | <i>AAGCTCAGTATCCGCTGACG</i>      | <i>GTTTCCGTAGTAGGACGGGAC</i>     | Mouse    |
| <i>Rasa2</i>           | <i>GACGAGGACAGTCTGTAGG</i>       | <i>AATCGCGCATTTTGTGGGGTC</i>     | Mouse    |
| <i>Kras</i>            | <i>CAAGAGCGCCTTGACGATACA</i>     | <i>CCAAGAGACAGGTTTCTCCATC</i>    | Mouse    |
| <i>Nras</i>            | <i>TGTTGGGAAAAGCGCCTTGA</i>      | <i>CCTGTCTCATGTAAGTGGTCT</i>     | Mouse    |
| <i>Grb2</i>            | <i>ACGGAGCCGGGAAGTATTTTC</i>     | <i>GGTTCCTGGACACGGATGTTG</i>     | Mouse    |
| <i>Gef2</i>            | <i>ATCTCCGTCTCCGGCATGA</i>       | <i>CAGGGTGTCTTTACAGCGGTT</i>     | Mouse    |
| <i>N-cadherin</i>      | <i>ATCATTCGCCAAGAGGAAGG</i>      | <i>CCAGTTGGCAGGATCAGACA</i>      | Mouse    |
| <i>Vegfa</i>           | <i>TGTACCTCCACCATGCCAAG</i>      | <i>TCTCAATCGGACGGCAGTAG</i>      | Mouse    |
| <i>Her2</i>            | <i>TGCAGGGAAACCTGGAACCTC</i>     | <i>ACAGGGGTGGTATTGTTACGCC</i>    | Mouse    |
| <i>Cmtm5</i>           | <i>TTGCGGAACTTGACAGCCTTC</i>     | <i>GCAGTGGATGTGGATTCTCAGAGC</i>  | Mouse    |
| <i>Tgfb1</i>           | <i>CCACCTGCAAGACCATCGAC</i>      | <i>CTGGCGAGCCTTAGTTGGAC</i>      | Mouse    |
| <i>Cdkn1a</i>          | <i>ATCACCAGGATTGGACATGG</i>      | <i>CGGTGTCAAGAGTCTAGGGGA</i>     | Mouse    |
| <i>Ins1</i>            | <i>CACTTCCTACCCCTGCTGG</i>       | <i>ACCACAAAGATGCTGTTTGACA</i>    | Mouse    |
| <i>Ins2</i>            | <i>GCTTCTTCTACACACCCATGTC</i>    | <i>AGCACTGATCTACAATGCCAC</i>     | Mouse    |
| <i>Pdx1</i>            | <i>CCCCAGTTTACAAGCTCGCT</i>      | <i>CTCGGTTCCATTCTGGGAAAGG</i>    | Mouse    |
| <i>Maf</i>             | <i>GGAGACCGACCGCATCATC</i>       | <i>TCATCCAGTAGTAGTCTTCCAGG</i>   | Mouse    |
| <i>IL-6</i>            | <i>CTGCAAGAGACTTCCATCCAG</i>     | <i>AGTGGTATAGACAGGTCTGTTGG</i>   | Mouse    |
| <i>ERα</i>             | <i>CCCGCCTTCTACAGGTCTAAT</i>     | <i>CTTTCTCGTTACTGCTGGACAG</i>    | Mouse    |
| <i>ERβ</i>             | <i>CTGTGATGAACACAGTGTTC</i>      | <i>CACATTTGGGCTTGCACTCTG</i>     | Mouse    |
| <i>Pten</i>            | <i>TGGATTCTGACTTAGACTTGACCT</i>  | <i>GCGGTGTCATAATGTCTCTCAG</i>    | Mouse    |
| <i>TRE-Msi1-1</i>      | <i>ACCTCCATGTGTGACCAAGG</i>      | <i>GCACAGCATTGCGGACATGC</i>      | Mouse    |
| <i>TRE-Msi1-2</i>      | <i>CGCAGAAGCGCGGCCGTCTGG</i>     |                                  | Mouse    |
| <i>Krt14rtTA</i>       | <i>CACGATACACCTGACTAGCTGGGTG</i> | <i>CATCACCCACAGGCTAGCGCCAAT</i>  | Mouse    |
| <i>mTmG-1</i>          | <i>CTCTGCTGCCTCTGGCTTCT</i>      | <i>CGAGGCGGATCACAAGCAATA</i>     | Mouse    |
| <i>mTmG-2</i>          | <i>TCAATGGGCGGGGGTCTGTT</i>      |                                  | Mouse    |
| <i>Krt14-CreERT2-1</i> | <i>GCGGTCTGGCAGTAAAACTATC</i>    | <i>GTGAAACAGCATTGCTGTCACTT</i>   | Mouse    |
| <i>Krt14-CreERT2-2</i> | <i>CTAGGCCACAGAATTGAAAGATCT</i>  | <i>GTAGGTGGAAATTCTAGCATCATCC</i> | Mouse    |
